# Supplementary material for: Prognostic value of Systemic immune-inflammation index in cancer: A meta-analysis
Source: PubMed Central journal article supplement — J Cancer. 2018 Sep 7;9(18):3295–302. doi: 10.7150/jca.25691 (PMC6160683; doi:10.7150/jca.25691), 2018-09-07
Supplement: jcav09p3295s1.pdf [file jcav09p3295s1.pdf]

Table S1. Study quality assessment based on the NEWCASTLE-OTTAWA QUALITY ASSESSMENT SCALE (NOS).

| Studies      | Years | Selection |   |   |   | Comparability |    | Outcome |   |   | Score |
|--------------|-------|-----------|---|---|---|---------------|----|---------|---|---|-------|
|              |       | 1         | 2 | 3 | 4 | 5A            | 5B | 6       | 7 | 8 |       |
| Hu[7]        | 2014  | Y         | Y | Y | Y | Y             | Y  | Y       | Y | N | 8     |
| Liu[11]      | 2015  | Y         | Y | Y | Y | Y             | Y  | Y       | Y | N | 8     |
| Yang[12]     | 2015  | Y         | Y | Y | Y | Y             | Y  | Y       | Y | Y | 9     |
| Hong[9]      | 2015  | Y         | Y | Y | Y | Y             | Y  | Y       | Y | N | 8     |
| Gardini[13]  | 2016  | Y         | Y | Y | Y | Y             | Y  | Y       | Y | Y | 9     |
| Wang[14]     | 2016  | Y         | Y | Y | N | Y             | Y  | Y       | Y | Y | 8     |
| Geng[8]      | 2016  | Y         | Y | Y | Y | Y             | Y  | Y       | N | Y | 8     |
| Loll[15]     | 2016  | Y         | Y | Y | Y | Y             | Y  | Y       | Y | Y | 9     |
| Loll[16]     | 2016  | Y         | Y | Y | Y | Y             | Y  | Y       | N | Y | 8     |
| Huang[17]    | 2016  | Y         | Y | Y | N | Y             | N  | Y       | Y | Y | 7     |
| Ha[18]       | 2016  | Y         | Y | Y | Y | Y             | Y  | Y       | Y | Y | 9     |
| Gao[10]      | 2016  | Y         | Y | Y | Y | Y             | Y  | Y       | N | Y | 8     |
| Passardi[19] | 2016  | Y         | Y | Y | N | Y             | N  | Y       | Y | Y | 7     |
| Jin[20]      | 2017  | Y         | Y | Y | Y | Y             | Y  | Y       | Y | Y | 9     |
| Feng[21]     | 2017  | Y         | Y | Y | Y | Y             | Y  | Y       | N | Y | 8     |
| Tong[22]     | 2017  | Y         | Y | Y | Y | Y             | Y  | Y       | Y | Y | 9     |
| wang[23]     | 2017  | Y         | Y | Y | Y | Y             | Y  | Y       | Y | Y | 9     |
| Yang [24]    | 2017  | Y         | Y | Y | Y | Y             | Y  | Y       | Y | Y | 9     |
| Yu[25]       | 2017  | Y         | Y | Y | Y | Y             | Y  | Y       | Y | Y | 9     |
| Conroy[26]   | 2017  | Y         | Y | Y | Y | Y             | Y  | Y       | Y | N | 8     |
| Wang[27]     | 2017  | Y         | Y | Y | Y | Y             | N  | Y       | N | Y | 7     |
| Chen[28]     | 2017  | Y         | Y | Y | Y | Y             | Y  | Y       | N | Y | 8     |

Abbreviations: Y: yes; N: no.
